# Supplementary material
Source: publisher site journal article supplement (https://www.dovepress.com/get_supplementary_file.php?f=454748.docx)
Supplement: Supplementary file 1 [file get_supplementary_file.php]

**Utilizing Group Model Building to Identify Barriers and Facilitators of Hypertension Management in Primary Health Care, China**

**Outline of the semi-structured interviews**

Table S1 Outline of semi-structured interviews with different stakeholders

| **Stakeholder** | **Questions** |
| --- | --- |
| Manager in different  institutions | 1. Regarding the hypertension control and management, what policies or regulations have been introduced by the local government or your   institution? How effective are these policies?   1. What do you think are the characteristics and advantages of the local hypertension management model? 2. Who are the main professionals in the local hypertension management   team? How is the division of labor and collaboration among professional team members?   1. What factors do you think restrict the development of primary   hypertension management? What other issues or policy suggestions are there in the management of hypertension in primary health care? |
| medical staff | 1. Could you please briefly introduce the status of hypertension management in your hospital or community? 2. Who is on your hypertension management team? What is its basic division of labor and collaboration? What is the current status of   cooperation with higher-level medical institutions and related institutions?   1. What difficulties have you encountered in managing hypertension patients? how did you solve it? 2. What opinions or suggestions do you have on improving the current situation of hypertension control and management in primary health care   in China? |
| patient | 1. How long have you been diagnosed with hypertension? Where was it diagnosed? 2. How do you usually control your blood pressure? How effective is your blood pressure control? 3. Can you get the tests and medicines you want from your community hospital or higher-level hospital? How satisfied are you with hypertension management services in your community? 4. What other hypertension management services would you like your   community to provide for you? |
| researcher | 1. Can you briefly describe your research experience in hypertension management? 2. As far as you know, what are the main hypertension management models in China at present? 3. What problems and challenges do you think China faces in hypertension   control and management in primary health care? |
